# Supplementary material
Source: publisher figshare collection journal article supplement (https://acs.figshare.com/ndownloader/files/4391893)
Supplement: Supplementary file 1 [file 4391893]

 
data_Global

_publ_contact_author_name            
'Richard S. Grainger'   
_publ_contact_author_address             
;
School of Chemistry, University of Birmingham, Edgbaston,
Birmingham, B15 2TT, UK.
;

_publ_contact_author_email           'r.s.grainger@bham.ac.uk'
_publ_contact_author_fax             '0121 414 4403'
_publ_contact_author_phone           '0121 414 4465'
_publ_section_title
;
Stereoselective \a,\a'-annelation reactions of 1,3-dioxan-5-ones
;     

loop_
_publ_author_name
_publ_author_address
_publ_author_footnote
'Carlisle,Julie'
;
Department of Chemistry, King's College London, Strand, London, WC2R 2LS, UK.
;
.
'Casey, Tyrone C.'
;
School of Chemistry, University of Birmingham, Edgbaston,
Birmingham, B15 2TT, UK.
;
.
'Grainger Richard S.'
;
School of Chemistry, University of Birmingham, Edgbaston,
Birmingham, B15 2TT, UK.
;
;
Previous Address: Department of Chemistry, King's College London, Strand, 
London, WC2R 2LS, UK. 
;
'Male, Louise'
;
School of Chemistry, University of Birmingham, Edgbaston,
Birmingham, B15 2TT, UK.
;
.
'Tisselli, Patrizia'
;
Department of Chemistry, King's College London, Strand, London, WC2R 2LS, UK.
;
.
 
data_12c


# EPSRC National Crystallography Service Code: 2009src0661
 
_audit_creation_method            SHELXL-97
_chemical_name_systematic
;
Methyl 3\b-Methoxy-3\a-methyl-9-oxo-2,4-dioxabicyclo[3.3.1]nonane-
7\b-carboxylate
;
_chemical_name_common             ?
_chemical_melting_point           ?
_chemical_formula_moiety          'C11 H16 O6'
_chemical_formula_sum
 'C11 H16 O6'
_chemical_formula_weight          244.24
 
loop_
 _atom_type_symbol
 _atom_type_description
 _atom_type_scat_dispersion_real
 _atom_type_scat_dispersion_imag
 _atom_type_scat_source
 'C'  'C'   0.0033   0.0016
 'International Tables Vol C Tables 4.2.6.8 and 6.1.1.4'
 'H'  'H'   0.0000   0.0000
 'International Tables Vol C Tables 4.2.6.8 and 6.1.1.4'
 'O'  'O'   0.0106   0.0060
 'International Tables Vol C Tables 4.2.6.8 and 6.1.1.4'
 
_symmetry_cell_setting            Monoclinic
_symmetry_space_group_name_H-M    'P 2(1)/c'
 
loop_
 _symmetry_equiv_pos_as_xyz
 'x, y, z'
 '-x, y+1/2, -z+1/2'
 '-x, -y, -z'
 'x, -y-1/2, z-1/2'
 
_cell_length_a                    5.9826(1)
_cell_length_b                    10.3401(2)
_cell_length_c                    18.4246(4)
_cell_angle_alpha                 90.00
_cell_angle_beta                  96.097(2)
_cell_angle_gamma                 90.00
_cell_volume                      1133.31(4)
_cell_formula_units_Z             4
_cell_measurement_temperature     120(2)
_cell_measurement_reflns_used     8106
_cell_measurement_theta_min       2.91
_cell_measurement_theta_max       27.48
 
_exptl_crystal_description        Block
_exptl_crystal_colour             Colourless
_exptl_crystal_size_max           0.25
_exptl_crystal_size_mid           0.22
_exptl_crystal_size_min           0.10
_exptl_crystal_density_meas       ?
_exptl_crystal_density_diffrn     1.431
_exptl_crystal_density_method     'not measured'
_exptl_crystal_F_000              520
_exptl_absorpt_coefficient_mu     0.117
_exptl_absorpt_correction_type    Multi-scan
_exptl_absorpt_correction_T_min   0.9713
_exptl_absorpt_correction_T_max   0.9884
_exptl_absorpt_process_details   'SADABS 2007/2 (Sheldrick, G.M., 2007)' 
 
_exptl_special_details
;
 SADABS was used to perform the Absorption correction
Estimated minimum and maximum transmission from 
SADABS: 0.6599 and 0.7456
The given Tmin and Tmax were generated using the SHELX SIZE command.
;
 
_diffrn_ambient_temperature       120(2)
_diffrn_radiation_wavelength      0.71073
_diffrn_radiation_type            MoK\a
_diffrn_radiation_source         'Bruker-Nonius FR591 rotating anode'
_diffrn_radiation_monochromator  'graphite'
_diffrn_measurement_device_type   
'Bruker-Nonius Roper CCD camera on \k-goniostat'
_diffrn_measurement_method       '\f & \w scans'
_diffrn_detector_area_resol_mean '9.091'
_diffrn_standards_number          ?
_diffrn_standards_interval_count  ?
_diffrn_standards_interval_time   ?
_diffrn_standards_decay_%         ?
_diffrn_reflns_number             14865
_diffrn_reflns_av_R_equivalents   0.0402
_diffrn_reflns_av_sigmaI/netI     0.0341
_diffrn_reflns_limit_h_min        -7
_diffrn_reflns_limit_h_max        7
_diffrn_reflns_limit_k_min        -12
_diffrn_reflns_limit_k_max        13
_diffrn_reflns_limit_l_min        -23
_diffrn_reflns_limit_l_max        23
_diffrn_reflns_theta_min          2.97
_diffrn_reflns_theta_max          27.48
_reflns_number_total              2600
_reflns_number_gt                 2150
_reflns_threshold_expression      >2\s(I)
 
_computing_data_collection        
'COLLECT (Hooft, R.W.W., 1998)'
_computing_cell_refinement        
'DENZO (Otwinowski & Minor, 1997) & COLLECT (Hooft, R.W.W., 1998)'
#Although determined using DirAx, the cell is refined in the HKL
#package during data reduction
_computing_data_reduction         
'DENZO (Otwinowski & Minor, 1997) & COLLECT (Hooft, R.W.W., 1998)'  
_computing_structure_solution     'SHELXS-97 (Sheldrick, 2008)'
_computing_structure_refinement   'SHELXL-97 (Sheldrick, 2008)'
_computing_molecular_graphics     'Ortep-3 for Windows (Farrugia, 1997)'
_computing_publication_material   'WinGX (Farrugia, 1999)'
 
_refine_special_details
;
 Refinement of F^2^ against ALL reflections.  The weighted R-factor wR and
 goodness of fit S are based on F^2^, conventional R-factors R are based
 on F, with F set to zero for negative F^2^. The threshold expression of
 F^2^ > 2\s(F^2^) is used only for calculating R-factors(gt) etc. and is
 not relevant to the choice of reflections for refinement.  R-factors based
 on F^2^ are statistically about twice as large as those based on F, and R-
 factors based on ALL data will be even larger.
;
 
_refine_ls_structure_factor_coef  Fsqd
_refine_ls_matrix_type            full
_refine_ls_weighting_scheme       calc
_refine_ls_weighting_details
 'calc w=1/[\s^2^(Fo^2^)+(0.0538P)^2^+0.4132P] where P=(Fo^2^+2Fc^2^)/3'
_atom_sites_solution_primary      direct
_atom_sites_solution_secondary    difmap
_atom_sites_solution_hydrogens    geom
_refine_ls_hydrogen_treatment     constr
_refine_ls_extinction_method      none
_refine_ls_extinction_coef        ?
_refine_ls_number_reflns          2600
_refine_ls_number_parameters      157
_refine_ls_number_restraints      0
_refine_ls_R_factor_all           0.0528
_refine_ls_R_factor_gt            0.0427
_refine_ls_wR_factor_ref          0.1160
_refine_ls_wR_factor_gt           0.1093
_refine_ls_goodness_of_fit_ref    1.105
_refine_ls_restrained_S_all       1.105
_refine_ls_shift/su_max           0.000
_refine_ls_shift/su_mean          0.000
 
loop_
 _atom_site_label
 _atom_site_type_symbol
 _atom_site_fract_x
 _atom_site_fract_y
 _atom_site_fract_z
 _atom_site_U_iso_or_equiv
 _atom_site_adp_type
 _atom_site_occupancy
 _atom_site_symmetry_multiplicity
 _atom_site_calc_flag
 _atom_site_refinement_flags
 _atom_site_disorder_assembly
 _atom_site_disorder_group
C1 C 0.2649(2) 0.59151(14) 0.22338(7) 0.0179(3) Uani 1 1 d . . .
C2 C 0.3260(2) 0.45047(14) 0.23648(7) 0.0170(3) Uani 1 1 d . . .
H2 H 0.4929 0.4399 0.2443 0.020 Uiso 1 1 calc R . .
C3 C 0.2297(2) 0.37888(14) 0.16710(8) 0.0181(3) Uani 1 1 d . . .
H3A H 0.2544 0.2848 0.1741 0.022 Uiso 1 1 calc R . .
H3B H 0.3117 0.4067 0.1258 0.022 Uiso 1 1 calc R . .
C4 C -0.0230(2) 0.40425(13) 0.14771(7) 0.0166(3) Uani 1 1 d . . .
H4 H -0.1070 0.3551 0.1829 0.020 Uiso 1 1 calc R . .
C5 C -0.0885(2) 0.54865(14) 0.15169(7) 0.0176(3) Uani 1 1 d . . .
H5A H -0.0366 0.5952 0.1096 0.021 Uiso 1 1 calc R . .
H5B H -0.2542 0.5562 0.1483 0.021 Uiso 1 1 calc R . .
C6 C 0.0147(2) 0.61142(13) 0.22260(7) 0.0175(3) Uani 1 1 d . . .
H6 H -0.0218 0.7058 0.2229 0.021 Uiso 1 1 calc R . .
C7 C 0.0983(2) 0.49299(14) 0.33271(7) 0.0178(3) Uani 1 1 d . . .
C8 C -0.0975(2) 0.35520(14) 0.07137(8) 0.0190(3) Uani 1 1 d . . .
C9 C -0.4113(3) 0.33105(17) -0.01754(8) 0.0267(4) Uani 1 1 d . . .
H9A H -0.3663 0.3966 -0.0516 0.040 Uiso 1 1 calc R . .
H9B H -0.5758 0.3272 -0.0206 0.040 Uiso 1 1 calc R . .
H9C H -0.3526 0.2465 -0.0303 0.040 Uiso 1 1 calc R . .
C10 C 0.4423(3) 0.56494(18) 0.39935(11) 0.0389(5) Uani 1 1 d . . .
H10A H 0.4083 0.5262 0.4455 0.058 Uiso 1 1 calc R . .
H10B H 0.5341 0.6426 0.4095 0.058 Uiso 1 1 calc R . .
H10C H 0.5250 0.5026 0.3724 0.058 Uiso 1 1 calc R . .
C11 C -0.0079(3) 0.42608(16) 0.39311(8) 0.0243(3) Uani 1 1 d . . .
H11A H -0.0737 0.4908 0.4234 0.037 Uiso 1 1 calc R . .
H11B H 0.1068 0.3766 0.4232 0.037 Uiso 1 1 calc R . .
H11C H -0.1260 0.3674 0.3720 0.037 Uiso 1 1 calc R . .
O1 O 0.39198(18) 0.67169(10) 0.20234(6) 0.0253(3) Uani 1 1 d . . .
O2 O 0.22321(16) 0.40026(9) 0.29832(5) 0.0182(2) Uani 1 1 d . . .
O3 O -0.07158(16) 0.54672(10) 0.28367(5) 0.0186(2) Uani 1 1 d . . .
O4 O 0.02470(18) 0.31644(13) 0.02799(6) 0.0323(3) Uani 1 1 d . . .
O5 O -0.32166(16) 0.36483(10) 0.05612(5) 0.0209(2) Uani 1 1 d . . .
O6 O 0.23761(17) 0.59902(10) 0.35671(5) 0.0206(2) Uani 1 1 d . . .
 
loop_
 _atom_site_aniso_label
 _atom_site_aniso_U_11
 _atom_site_aniso_U_22
 _atom_site_aniso_U_33
 _atom_site_aniso_U_23
 _atom_site_aniso_U_13
 _atom_site_aniso_U_12
C1 0.0213(7) 0.0178(7) 0.0142(6) -0.0016(5) 0.0009(5) -0.0023(6)
C2 0.0161(6) 0.0181(7) 0.0173(7) 0.0011(5) 0.0038(5) -0.0003(5)
C3 0.0197(7) 0.0178(7) 0.0173(7) -0.0012(5) 0.0041(5) 0.0019(5)
C4 0.0193(7) 0.0164(7) 0.0148(7) -0.0008(5) 0.0045(5) 0.0001(5)
C5 0.0185(6) 0.0186(7) 0.0157(6) 0.0009(5) 0.0015(5) 0.0028(5)
C6 0.0224(7) 0.0145(7) 0.0159(7) 0.0009(5) 0.0038(5) 0.0018(5)
C7 0.0213(7) 0.0161(7) 0.0159(7) -0.0007(5) 0.0015(5) 0.0025(5)
C8 0.0211(7) 0.0189(7) 0.0173(7) -0.0007(5) 0.0041(5) -0.0022(6)
C9 0.0282(8) 0.0342(9) 0.0168(7) -0.0028(6) -0.0013(6) -0.0032(7)
C10 0.0397(10) 0.0290(9) 0.0423(10) -0.0045(8) -0.0223(8) 0.0050(8)
C11 0.0297(8) 0.0263(8) 0.0180(7) 0.0031(6) 0.0069(6) 0.0028(6)
O1 0.0272(6) 0.0221(6) 0.0269(6) 0.0031(4) 0.0043(4) -0.0068(4)
O2 0.0232(5) 0.0137(5) 0.0186(5) 0.0005(4) 0.0059(4) 0.0015(4)
O3 0.0192(5) 0.0213(5) 0.0154(5) 0.0031(4) 0.0026(4) 0.0026(4)
O4 0.0257(6) 0.0498(8) 0.0225(6) -0.0133(5) 0.0070(5) -0.0017(5)
O5 0.0203(5) 0.0254(6) 0.0165(5) -0.0025(4) 0.0002(4) 0.0002(4)
O6 0.0242(5) 0.0172(5) 0.0193(5) -0.0015(4) -0.0023(4) 0.0022(4)
 
_geom_special_details
;
 All s.u.'s (except the s.u. in the dihedral angle between two l.s. planes)
 are estimated using the full covariance matrix.  The cell s.u.'s are taken
 into account individually in the estimation of s.u.'s in distances, angles
 and torsion angles; correlations between s.u.'s in cell parameters are only
 used when they are defined by crystal symmetry.  An approximate (isotropic)
 treatment of cell s.u.'s is used for estimating s.u.'s involving l.s. planes.
;
 
loop_
 _geom_bond_atom_site_label_1
 _geom_bond_atom_site_label_2
 _geom_bond_distance
 _geom_bond_site_symmetry_2
 _geom_bond_publ_flag
C1 O1 1.2158(18) . ?
C1 C6 1.510(2) . ?
C1 C2 1.517(2) . ?
C2 O2 1.4473(16) . ?
C2 C3 1.5353(19) . ?
C2 H2 1.0000 . ?
C3 C4 1.5387(19) . ?
C3 H3A 0.9900 . ?
C3 H3B 0.9900 . ?
C4 C8 1.5169(19) . ?
C4 C5 1.5474(19) . ?
C4 H4 1.0000 . ?
C5 C6 1.5289(19) . ?
C5 H5A 0.9900 . ?
C5 H5B 0.9900 . ?
C6 O3 1.4504(16) . ?
C6 H6 1.0000 . ?
C7 O3 1.4011(16) . ?
C7 O2 1.4070(17) . ?
C7 O6 1.4191(17) . ?
C7 C11 1.507(2) . ?
C8 O4 1.2077(18) . ?
C8 O5 1.3441(17) . ?
C9 O5 1.4481(17) . ?
C9 H9A 0.9800 . ?
C9 H9B 0.9800 . ?
C9 H9C 0.9800 . ?
C10 O6 1.4270(18) . ?
C10 H10A 0.9800 . ?
C10 H10B 0.9800 . ?
C10 H10C 0.9800 . ?
C11 H11A 0.9800 . ?
C11 H11B 0.9800 . ?
C11 H11C 0.9800 . ?
 
loop_
 _geom_angle_atom_site_label_1
 _geom_angle_atom_site_label_2
 _geom_angle_atom_site_label_3
 _geom_angle
 _geom_angle_site_symmetry_1
 _geom_angle_site_symmetry_3
 _geom_angle_publ_flag
O1 C1 C6 123.85(13) . . ?
O1 C1 C2 123.94(13) . . ?
C6 C1 C2 110.76(11) . . ?
O2 C2 C1 110.79(11) . . ?
O2 C2 C3 109.24(11) . . ?
C1 C2 C3 105.57(11) . . ?
O2 C2 H2 110.4 . . ?
C1 C2 H2 110.4 . . ?
C3 C2 H2 110.4 . . ?
C2 C3 C4 112.55(11) . . ?
C2 C3 H3A 109.1 . . ?
C4 C3 H3A 109.1 . . ?
C2 C3 H3B 109.1 . . ?
C4 C3 H3B 109.1 . . ?
H3A C3 H3B 107.8 . . ?
C8 C4 C3 110.07(11) . . ?
C8 C4 C5 108.40(11) . . ?
C3 C4 C5 113.64(11) . . ?
C8 C4 H4 108.2 . . ?
C3 C4 H4 108.2 . . ?
C5 C4 H4 108.2 . . ?
C6 C5 C4 111.65(11) . . ?
C6 C5 H5A 109.3 . . ?
C4 C5 H5A 109.3 . . ?
C6 C5 H5B 109.3 . . ?
C4 C5 H5B 109.3 . . ?
H5A C5 H5B 108.0 . . ?
O3 C6 C1 111.34(11) . . ?
O3 C6 C5 108.82(11) . . ?
C1 C6 C5 105.08(11) . . ?
O3 C6 H6 110.5 . . ?
C1 C6 H6 110.5 . . ?
C5 C6 H6 110.5 . . ?
O3 C7 O2 111.31(11) . . ?
O3 C7 O6 104.85(11) . . ?
O2 C7 O6 110.15(11) . . ?
O3 C7 C11 108.92(11) . . ?
O2 C7 C11 107.79(12) . . ?
O6 C7 C11 113.85(12) . . ?
O4 C8 O5 123.15(13) . . ?
O4 C8 C4 125.84(13) . . ?
O5 C8 C4 110.96(11) . . ?
O5 C9 H9A 109.5 . . ?
O5 C9 H9B 109.5 . . ?
H9A C9 H9B 109.5 . . ?
O5 C9 H9C 109.5 . . ?
H9A C9 H9C 109.5 . . ?
H9B C9 H9C 109.5 . . ?
O6 C10 H10A 109.5 . . ?
O6 C10 H10B 109.5 . . ?
H10A C10 H10B 109.5 . . ?
O6 C10 H10C 109.5 . . ?
H10A C10 H10C 109.5 . . ?
H10B C10 H10C 109.5 . . ?
C7 C11 H11A 109.5 . . ?
C7 C11 H11B 109.5 . . ?
H11A C11 H11B 109.5 . . ?
C7 C11 H11C 109.5 . . ?
H11A C11 H11C 109.5 . . ?
H11B C11 H11C 109.5 . . ?
C7 O2 C2 113.60(10) . . ?
C7 O3 C6 112.94(10) . . ?
C8 O5 C9 116.12(11) . . ?
C7 O6 C10 114.95(11) . . ?
 
_diffrn_measured_fraction_theta_max    0.998
_diffrn_reflns_theta_full              27.48
_diffrn_measured_fraction_theta_full   0.998
_refine_diff_density_max    0.490
_refine_diff_density_min   -0.453
_refine_diff_density_rms    0.147
